# Supplementary material
Source: MDPI journal article supplement (https://www.mdpi.com/2073-4441/16/4/522)
Supplement: s1 [file s1]

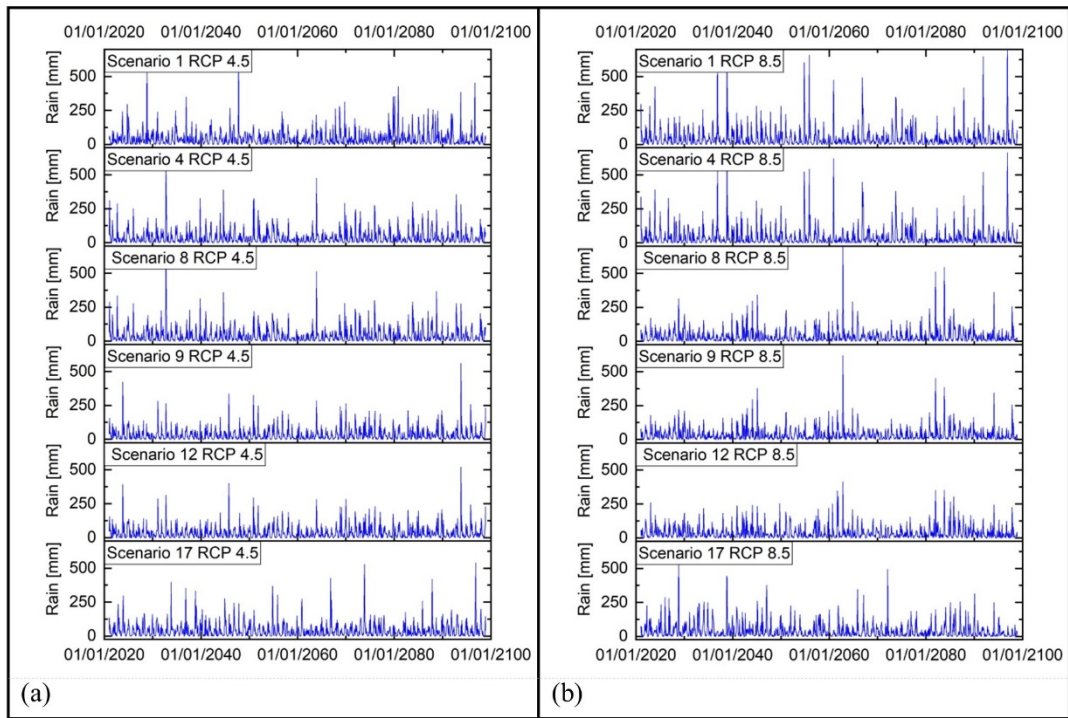

**Figure S1.** Monthly rainfall predicted at the Bezirk Dam weather station for each of the six selected scenarios for (a) RCP 4.5 and (b) RCP 8.5.

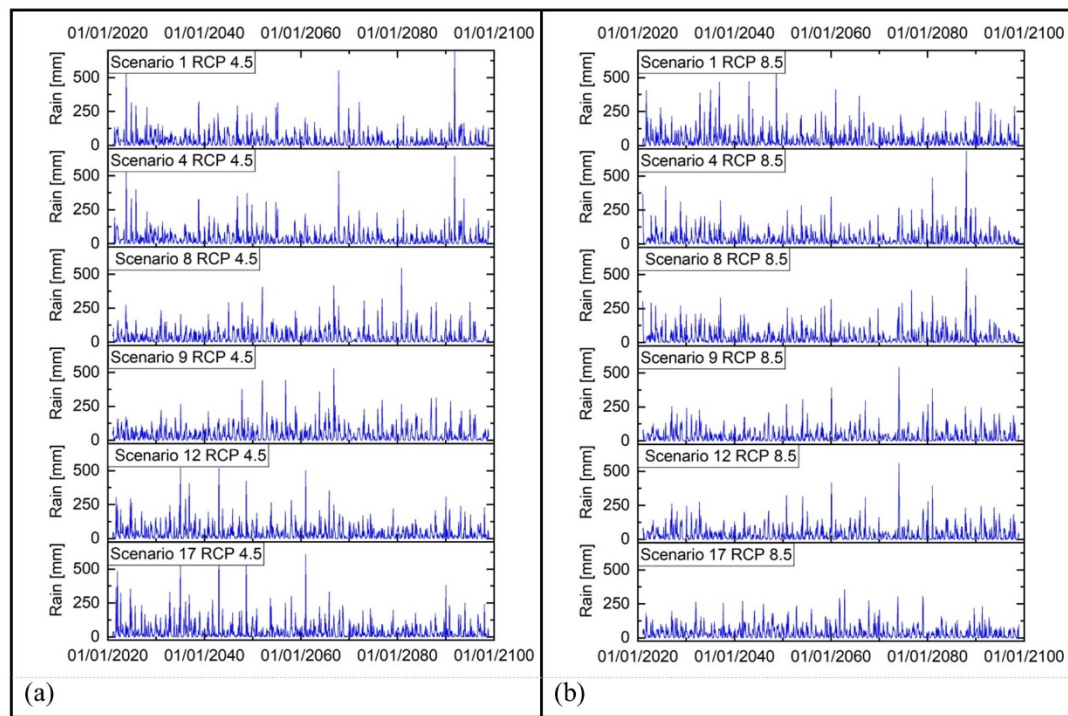

**Figure S2.** Monthly rainfall predicted at the Ben Khalled Ferme Latifa weather station for each of the six selected scenarios for (a) RCP 4.5 and (b) RCP 8.5.

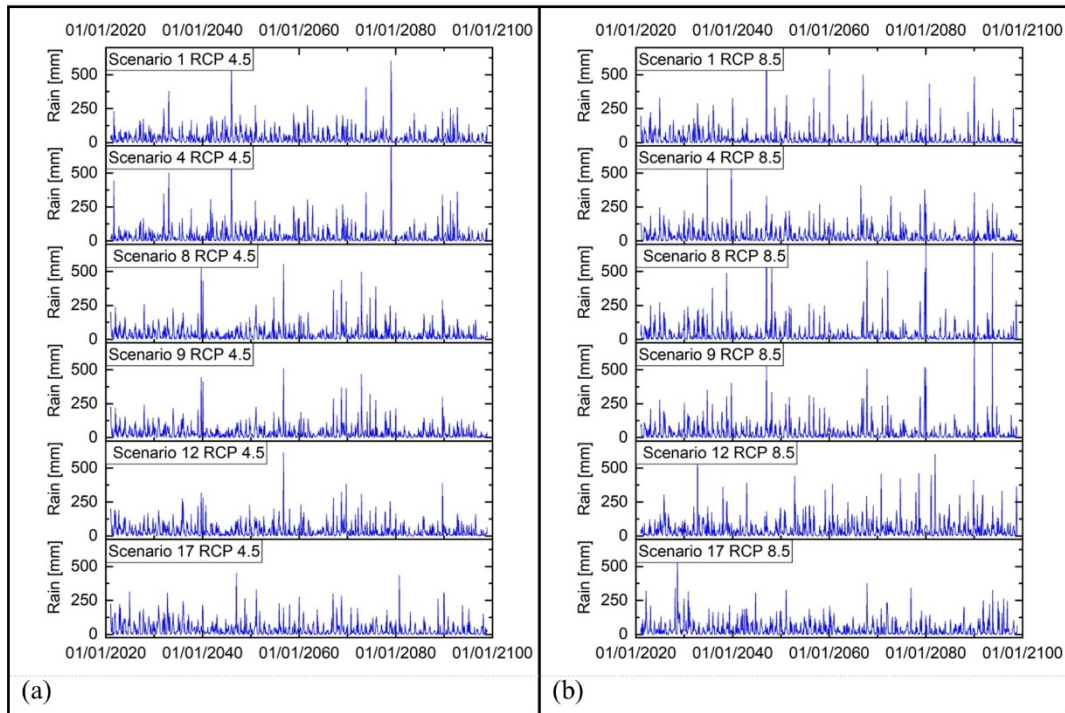

**Figure S3.** Monthly rainfall predicted at the CTV Bou Argoub weather station for each of the six selected scenarios for (a) RCP 4.5 and (b) RCP 8.5.

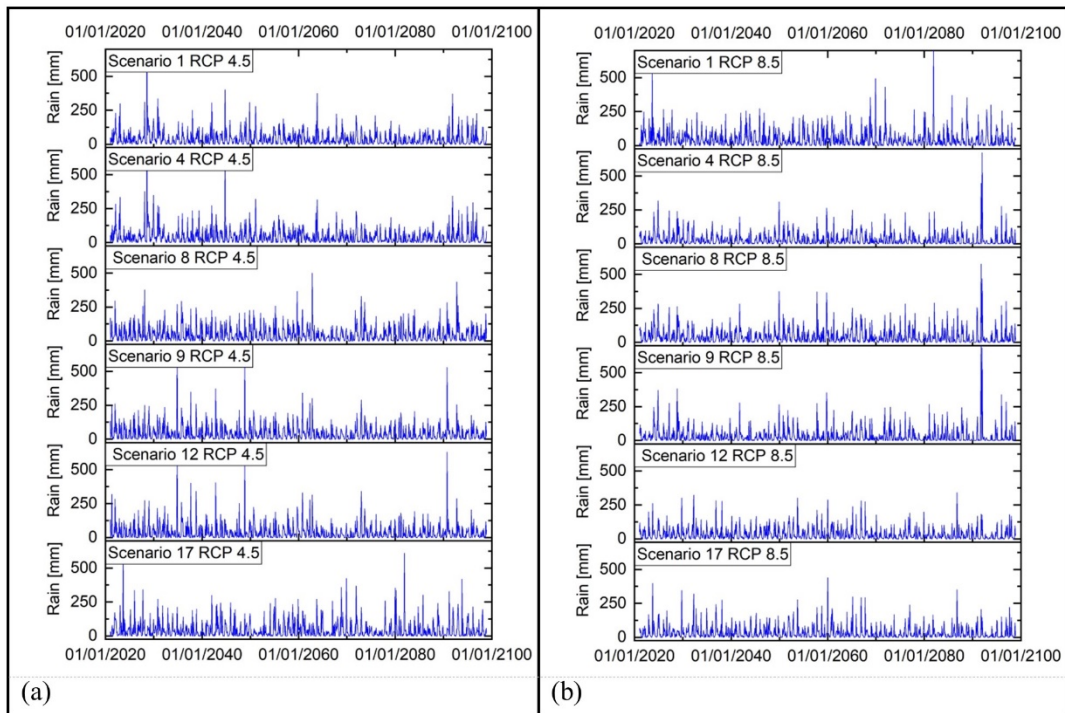

**Figure S4.** Monthly rainfall predicted at the Grombalia DRE weather station for each of the six selected scenarios for (a) RCP 4.5 and (b) RCP 8.5.

**Table S1.** Coordinates of the DGRE observation wells, artificial recharge basins, virtual observation points and wadi points. All virtual observation points and wadi points are located in the first (upper) slice of the numerical groundwater model.

| Observation Wells (DGRE network) |                   |         |           | Virtual Observation Points |                   |         | Wadi Points |                   |         |
|----------------------------------|-------------------|---------|-----------|----------------------------|-------------------|---------|-------------|-------------------|---------|
| ID_WEL                           | (WGS 84 UTM Z32N) |         | Ground    | ID_WEL                     | (WGS 84 UTM Z32N) |         | ID_WEL      | (WGS 84 UTM Z32N) |         |
|                                  | X                 | Y       | Elevation |                            | X                 | Y       |             | X                 | Y       |
| 12440                            | 632425            | 4050984 | 59        | 1                          | 638128            | 4066021 | WP1         | 632100            | 4063000 |
| 2198                             | 632033            | 4051733 | 51        | 2                          | 637530            | 4064137 | WP3         | 637300            | 4067000 |
| 6922                             | 629976            | 4053071 | 61        | 3                          | 637062            | 4062344 | WP4         | 634500            | 4060000 |
| 2183                             | 633683            | 4054255 | 28        | 4                          | 636504            | 4060616 | WP5         | 638700            | 4067000 |
| 2171                             | 633687            | 4054668 | 25        | 5                          | 635556            | 4067430 | WP6         | 634900            | 4059000 |
| 2551                             | 630582            | 4059379 | 12        | 6                          | 634617            | 4065326 | WP7         | 639700            | 4066000 |
| 2534                             | 628962            | 4062043 | 4         | 7                          | 634180            | 4064506 | WP8         | 635300            | 4057000 |
| 1404                             | 634383            | 4063387 | 6         | 8                          | 633585            | 4063633 | WP9         | 640600            | 4065000 |
| PZ Marja                         | 637046            | 4065485 | 8         | 9                          | 632844            | 4063051 | WP10        | 635900            | 4056000 |
| 2008                             | 638834            | 4043615 | 70        | 10                         | 632593            | 4062958 | WP11        | 635700            | 4056000 |
| 2025                             | 637713            | 4046315 | 61        | 11                         | 629246            | 4063236 | WP12        | 630200            | 4055000 |
| 11419                            | 640872            | 4044074 | 72        | 12                         | 629021            | 4063302 | WP13        | 641700            | 4066000 |
| 13474                            | 639663            | 4044928 | 63        | 13                         | 628637            | 4063395 | WP14        | 639900            | 4060000 |
| 8589                             | 638840            | 4051514 | 40        | 14                         | 638506            | 4067231 | WP15        | 636600            | 4055000 |
| 8588                             | 638471            | 4052770 | 36        | 15                         | 635424            | 4059029 | WP16        | 635800            | 4055000 |
| 13397                            | 638270            | 4053961 | 35        | 16                         | 634180            | 4058473 | WP17        | 643000            | 4066000 |
| 12202                            | 642804            | 4050072 | 66        | 17                         | 631984            | 4058606 | WP18        | 641200            | 4060000 |
| 13571                            | 642693            | 4059291 | 57        | 18                         | 629365            | 4058910 | WP19        | 637200            | 4054000 |
| PZ Beb                           | 643165            | 4067526 | 52        | 19                         | 640279            | 4065683 | WP20        | 636600            | 4054000 |
| PZ                               | 640766            | 4066443 | 32        | 20                         | 639565            | 4063540 | WP21        | 643900            | 4066000 |
| 8844                             | 636847            | 4048876 | 44        | 21                         | 639022            | 4061331 | WP22        | 642000            | 4060000 |
| Omar-                            | 639811            | 4054091 | 42        | 22                         | 637554            | 4057561 | WP23        | 637800            | 4053000 |
| 1142                             | 640627            | 4053939 | 48        | 23                         | 636945            | 4056952 | WP24        | 636700            | 4052000 |
| 1144                             | 639999            | 4053899 | 43        | 24                         | 635649            | 4056066 | WP25        | 644900            | 4065000 |
| 8581                             | 636269            | 4062669 | 16        | 25                         | 634418            | 4055391 | WP26        | 643200            | 4060000 |
| Salah B.                         | 638368            | 4058710 | 29        | 26                         | 633426            | 4055285 | WP27        | 637300            | 4050000 |
| 2228                             | 636460            | 4064907 | 8         | 27                         | 632461            | 4055523 | WP28        | 638600            | 4051000 |
| 2379                             | 638140            | 4069390 | 6         | 28                         | 630847            | 4055775 | WP29        | 644300            | 4060000 |
| 12134                            | 641588            | 4059588 | 51        | 29                         | 642655            | 4066213 | WP30        | 637600            | 4049000 |
| 12405                            | 631912            | 4055350 | 28        | 30                         | 641874            | 4064466 | WP31        | 638800            | 4049000 |
| 12406                            | 636876            | 4062774 | 15        | 31                         | 641054            | 4061939 | WP32        | 639300            | 4047000 |
| 12961                            | 642812            | 4057279 | 56        | 32                         | 640644            | 4058884 | WP33        | 640100            | 4046000 |
| 13329                            | 638260            | 4055999 | 30        | 33                         | 639374            | 4055629 | WP34        | 631100            | 4057000 |
| 13360                            | 642111            | 4053813 | 55        | 34                         | 637972            | 4054703 | WP35        | 629600            | 4053000 |
|                                  |                   |         |           | 35                         | 635736            | 4053499 | WP36        | 635500            | 4054000 |
|                                  |                   |         |           | 36                         | 634969            | 4052904 | WP37        | 633600            | 4051000 |
|                                  |                   |         |           | 37                         | 634082            | 4051740 |             |                   |         |
| Artificial                       | (WGS 84 UTM Z32N) |         | Ground    | 38                         | 632905            | 4050920 |             |                   |         |
| Recharge                         | X Coordinate      | Y       | Elevation | 39                         | 644579            | 4065199 |             |                   |         |
| Bassin                           |                   |         |           | 40                         | 643722            | 4063527 |             |                   |         |
| Sidi                             | 643856            | 4057432 | 75        | 41                         | 643224            | 4062321 |             |                   |         |
| El Gobba                         | 642485            | 4053458 | 60        | 42                         | 642843            | 4060595 |             |                   |         |
| El Gobba                         | 643419            | 4050435 | 75        | 43                         | 643023            | 4058585 |             |                   |         |
| Bou                              | 639366            | 4045000 | 62        | 44                         | 643637            | 4056225 |             |                   |         |
| El                               | 638747            | 4059473 | 37        | 45                         | 642219            | 4053452 |             |                   |         |
|                                  |                   |         |           | 46                         | 640695            | 4052531 |             |                   |         |
|                                  |                   |         |           | 47                         | 637985            | 4051028 |             |                   |         |
|                                  |                   |         |           | 48                         | 634916            | 4048478 |             |                   |         |
|                                  |                   |         |           | 49                         | 644764            | 4051160 |             |                   |         |
|                                  |                   |         |           | 50                         | 643431            | 4050123 |             |                   |         |
|                                  |                   |         |           | 51                         | 642319            | 4049382 |             |                   |         |
|                                  |                   |         |           | 52                         | 640986            | 4048642 |             |                   |         |
|                                  |                   |         |           | 53                         | 639864            | 4048017 |             |                   |         |

|    |        |         |
|----|--------|---------|
| 54 | 639462 | 4047816 |
| 55 | 638869 | 4047467 |
| 56 | 638372 | 4047234 |
| 57 | 637758 | 4046853 |
| 58 | 637102 | 4046419 |
| 59 | 644066 | 4045668 |
| 60 | 643547 | 4045350 |
| 61 | 642859 | 4044863 |
| 62 | 642425 | 4044588 |
| 63 | 641843 | 4044112 |
| 64 | 641494 | 4043847 |
| 65 | 641197 | 4043657 |
| 66 | 640901 | 4043466 |
| 67 | 640192 | 4042958 |
| 68 | 639525 | 4042471 |
| 69 | 637807 | 4065097 |
| 70 | 636305 | 4049460 |

---

**Table S2.** Results of scenarios based on RCP 4.5: time averages of the minimum, mean and maximum values of computed hydraulic heads. OW=observation well.

| DGRE OW        | Near Future (2021-2040) |       |                 | Mid Term (2041-2060)  |       |                 | Long Term (2081-2098) |       |                 |
|----------------|-------------------------|-------|-----------------|-----------------------|-------|-----------------|-----------------------|-------|-----------------|
|                | Water table level [m]   |       |                 | Water table level [m] |       |                 | Water table level [m] |       |                 |
|                | Average Minimum         | Mean  | Average Maximum | Average Minimum       | Mean  | Average Maximum | Average Minimum       | Mean  | Average Maximum |
| 12440          | 23.86                   | 24.42 | 26.93           | 23.78                 | 23.99 | 24.25           | 23.61                 | 23.82 | 24.14           |
| 2198           | 22.22                   | 22.90 | 26.54           | 22.15                 | 22.37 | 22.64           | 21.98                 | 22.20 | 22.53           |
| 6922           | 20.14                   | 20.87 | 27.88           | 20.10                 | 20.25 | 20.46           | 19.99                 | 20.14 | 20.38           |
| 2183           | 22.73                   | 23.29 | 24.89           | 22.66                 | 23.00 | 23.44           | 22.50                 | 22.80 | 23.33           |
| 2171           | 22.57                   | 23.13 | 24.68           | 22.49                 | 22.85 | 23.34           | 22.33                 | 22.64 | 23.22           |
| 2551           | 13.25                   | 13.76 | 14.51           | 13.15                 | 13.58 | 14.02           | 13.04                 | 13.46 | 13.94           |
| 2534           | 7.76                    | 8.42  | 9.49            | 7.60                  | 8.30  | 9.15            | 7.60                  | 8.31  | 9.27            |
| 1404           | 9.29                    | 9.95  | 11.03           | 9.34                  | 10.01 | 10.83           | 9.32                  | 9.99  | 10.92           |
| PZ Marja       | 6.70                    | 7.90  | 9.05            | 7.32                  | 8.12  | 9.03            | 7.38                  | 8.17  | 9.12            |
| 2008           | 33.08                   | 34.93 | 38.73           | 31.93                 | 32.58 | 33.34           | 30.77                 | 31.17 | 31.64           |
| 2025           | 35.32                   | 36.19 | 38.53           | 34.90                 | 35.19 | 35.61           | 34.34                 | 34.58 | 34.85           |
| 11419          | 32.78                   | 34.75 | 38.72           | 31.55                 | 32.24 | 33.06           | 30.30                 | 30.76 | 31.36           |
| 13474          | 34.45                   | 35.74 | 39.13           | 33.72                 | 34.15 | 34.69           | 32.92                 | 33.23 | 33.57           |
| 8589           | 27.96                   | 29.11 | 29.76           | 28.76                 | 29.20 | 29.84           | 28.40                 | 28.78 | 29.50           |
| 8588           | 26.00                   | 26.88 | 27.49           | 26.56                 | 26.96 | 27.57           | 26.26                 | 26.60 | 27.27           |
| 13397          | 24.50                   | 25.53 | 26.20           | 25.22                 | 25.66 | 26.30           | 24.92                 | 25.29 | 26.01           |
| 12202          | 29.33                   | 30.51 | 31.63           | 28.00                 | 29.15 | 30.84           | 25.25                 | 26.52 | 28.12           |
| 13571          | 22.79                   | 23.27 | 23.75           | 23.09                 | 23.31 | 23.60           | 22.90                 | 23.08 | 23.39           |
| PZ Beb Dar     | 14.68                   | 16.10 | 22.47           | 14.52                 | 14.86 | 15.21           | 14.57                 | 14.92 | 15.26           |
| PZ Tebban      | 10.10                   | 12.43 | 13.45           | 11.67                 | 12.24 | 12.94           | 11.74                 | 12.32 | 13.06           |
| 8844           | 35.64                   | 35.97 | 36.59           | 35.48                 | 35.66 | 35.86           | 35.24                 | 35.39 | 35.61           |
| Omar-beji      | 22.05                   | 23.71 | 24.49           | 23.41                 | 23.96 | 24.64           | 22.89                 | 23.36 | 24.15           |
| 1142           | 20.91                   | 22.78 | 23.57           | 22.54                 | 23.07 | 23.66           | 21.93                 | 22.38 | 23.09           |
| 1144           | 22.00                   | 23.68 | 24.47           | 23.39                 | 23.94 | 24.61           | 22.85                 | 23.31 | 24.09           |
| 8581           | 12.28                   | 13.30 | 14.40           | 12.76                 | 13.47 | 14.28           | 12.73                 | 13.40 | 14.29           |
| Salah Ben Rjeb | 19.01                   | 21.23 | 22.05           | 20.93                 | 21.51 | 22.20           | 20.61                 | 21.10 | 21.94           |
| 2228           | 8.19                    | 9.14  | 10.25           | 8.53                  | 9.30  | 10.19           | 8.57                  | 9.32  | 10.27           |
| 2379           | 1.86                    | 2.56  | 3.53            | 2.17                  | 2.59  | 3.26            | 2.19                  | 2.64  | 3.43            |
| 12134          | 20.44                   | 22.66 | 23.06           | 22.59                 | 22.83 | 23.16           | 22.40                 | 22.60 | 22.95           |
| 12405          | 20.34                   | 20.99 | 24.16           | 20.28                 | 20.54 | 20.82           | 20.13                 | 20.36 | 20.74           |
| 12406          | 12.78                   | 13.95 | 15.05           | 13.43                 | 14.16 | 14.97           | 13.41                 | 14.09 | 14.96           |
| 12961          | 17.63                   | 20.15 | 20.86           | 20.06                 | 20.50 | 20.93           | 19.54                 | 19.90 | 20.44           |

**Table S3.** Results of scenarios based on RCP 8.5: time averages of the minimum, mean and maximum values of the computed hydraulic heads. OW=observation well.

| DGRE OW        | Near Future (2021-2040) |       |                 | Mid Term (2041-2060)  |       |                 | Long Term (2081-2098) |       |                 |
|----------------|-------------------------|-------|-----------------|-----------------------|-------|-----------------|-----------------------|-------|-----------------|
|                | Water table level [m]   |       |                 | Water table level [m] |       |                 | Water table level [m] |       |                 |
|                | Average Minimum         | Mean  | Average Maximum | Average Minimum       | Mean  | Average Maximum | Average Minimum       | Mean  | Average Maximum |
| 12440          | 23.77                   | 24.44 | 27.21           | 23.70                 | 23.89 | 24.11           | 23.64                 | 23.81 | 24.20           |
| 2198           | 22.12                   | 22.95 | 27.04           | 22.06                 | 22.26 | 22.49           | 22.00                 | 22.18 | 22.59           |
| 6922           | 20.08                   | 20.97 | 29.17           | 20.03                 | 20.18 | 20.36           | 20.00                 | 20.13 | 20.44           |
| 2183           | 22.65                   | 23.31 | 25.19           | 22.57                 | 22.90 | 23.32           | 22.51                 | 22.82 | 23.31           |
| 2171           | 22.49                   | 23.14 | 24.96           | 22.40                 | 22.76 | 23.22           | 22.34                 | 22.67 | 23.22           |
| 2551           | 13.13                   | 13.82 | 14.54           | 12.99                 | 13.56 | 14.11           | 12.81                 | 13.41 | 13.97           |
| 2534           | 7.65                    | 8.54  | 9.69            | 7.44                  | 8.39  | 9.66            | 7.26                  | 8.24  | 9.34            |
| 1404           | 9.32                    | 10.05 | 11.32           | 9.22                  | 10.09 | 11.30           | 9.03                  | 9.95  | 11.00           |
| PZ Marja       | 6.83                    | 8.02  | 9.56            | 7.16                  | 8.27  | 9.62            | 6.93                  | 8.07  | 9.21            |
| 2008           | 33.77                   | 35.42 | 38.94           | 32.47                 | 33.13 | 33.94           | 31.29                 | 31.65 | 32.13           |
| 2025           | 35.55                   | 36.37 | 38.68           | 35.03                 | 35.33 | 35.72           | 34.55                 | 34.79 | 35.13           |
| 11419          | 33.59                   | 35.39 | 39.04           | 32.16                 | 32.88 | 33.81           | 30.88                 | 31.29 | 31.86           |
| 13474          | 34.91                   | 36.09 | 39.43           | 34.04                 | 34.48 | 35.06           | 33.27                 | 33.55 | 33.93           |
| 8589           | 28.29                   | 29.08 | 29.90           | 28.70                 | 29.10 | 29.65           | 28.52                 | 28.95 | 29.61           |
| 8588           | 26.13                   | 26.85 | 27.60           | 26.50                 | 26.87 | 27.39           | 26.35                 | 26.74 | 27.38           |
| 13397          | 24.67                   | 25.50 | 26.32           | 25.15                 | 25.56 | 26.11           | 25.01                 | 25.43 | 26.11           |
| 12202          | 29.54                   | 30.62 | 31.85           | 28.08                 | 29.31 | 30.65           | 26.19                 | 27.37 | 28.84           |
| 13571          | 22.90                   | 23.27 | 24.00           | 23.04                 | 23.25 | 23.51           | 22.95                 | 23.17 | 23.45           |
| PZ Beb Dar     | 14.68                   | 16.45 | 23.39           | 14.48                 | 14.99 | 15.52           | 14.32                 | 14.81 | 15.30           |
| PZ Tebban      | 10.41                   | 12.56 | 13.55           | 11.58                 | 12.39 | 13.41           | 11.41                 | 12.21 | 13.14           |
| 8844           | 35.66                   | 35.98 | 36.47           | 35.47                 | 35.65 | 35.82           | 35.31                 | 35.46 | 35.67           |
| Omar-beji      | 22.35                   | 23.65 | 24.69           | 23.30                 | 23.81 | 24.38           | 23.05                 | 23.60 | 24.26           |
| 1142           | 21.23                   | 22.71 | 23.72           | 22.41                 | 22.90 | 23.39           | 22.11                 | 22.67 | 23.17           |
| 1144           | 22.30                   | 23.62 | 24.65           | 23.27                 | 23.78 | 24.34           | 23.01                 | 23.57 | 24.20           |
| 8581           | 12.45                   | 13.40 | 14.76           | 12.65                 | 13.55 | 14.73           | 12.39                 | 13.37 | 14.39           |
| Salah Ben Rjeb | 19.44                   | 21.19 | 22.29           | 20.80                 | 21.39 | 22.02           | 20.67                 | 21.24 | 21.98           |
| 2228           | 8.32                    | 9.26  | 10.71           | 8.38                  | 9.42  | 10.74           | 8.17                  | 9.24  | 10.35           |
| 2379           | 1.83                    | 2.61  | 3.61            | 2.10                  | 2.67  | 3.58            | 2.04                  | 2.59  | 3.54            |
| 12134          | 20.63                   | 22.63 | 23.16           | 22.53                 | 22.77 | 23.06           | 22.45                 | 22.69 | 23.01           |
| 12405          | 20.25                   | 21.04 | 24.72           | 20.17                 | 20.44 | 20.71           | 20.12                 | 20.36 | 20.72           |
| 12406          | 12.96                   | 14.05 | 15.46           | 13.32                 | 14.25 | 15.43           | 13.04                 | 14.05 | 15.06           |
| 12961          | 17.83                   | 20.08 | 20.95           | 19.94                 | 20.34 | 20.72           | 19.69                 | 20.15 | 20.51           |
| 13329          | 22.43                   | 23.67 | 24.68           | 23.29                 | 23.81 | 24.40           | 23.14                 | 23.67 | 24.38           |
| 13360          | 20.34                   | 22.04 | 23.01           | 21.80                 | 22.27 | 22.70           | 21.48                 | 22.01 | 22.44           |
